# Supplementary material
Source: PubMed Central journal article supplement (PMC2906333)

**A**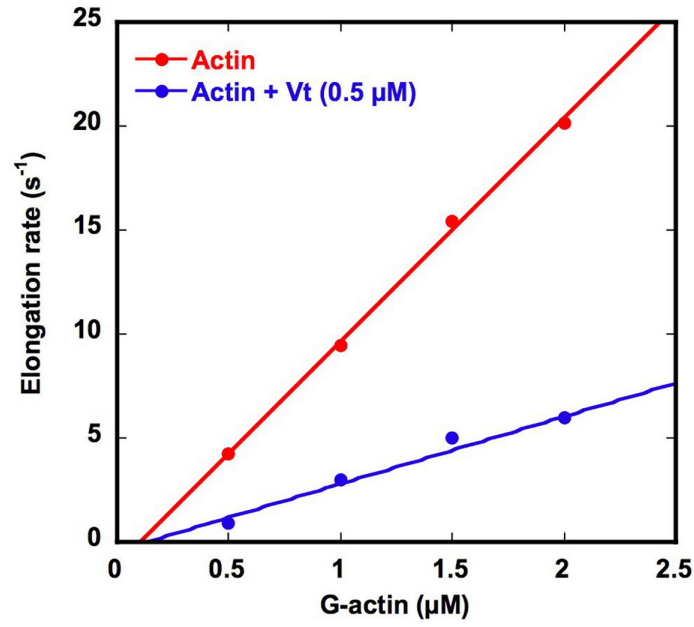**B**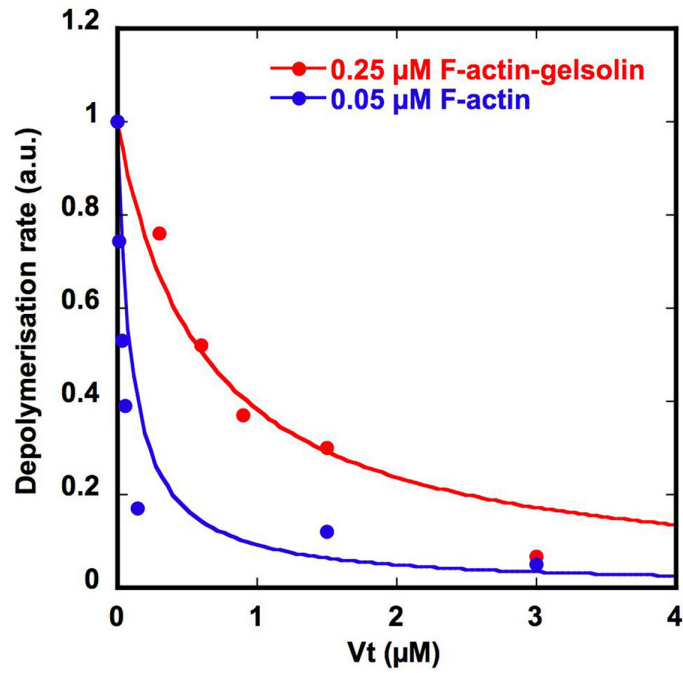

Figure S1

Supplement: supp_M110.102830_jbc.M110.102830-2.pdf [file supp_M110.102830_jbc.M110.102830-2.pdf]

# A

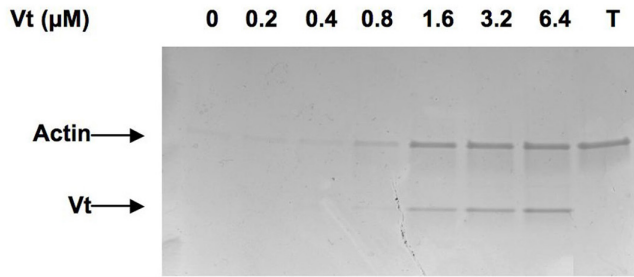

# B

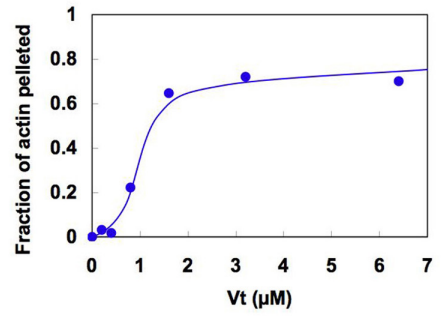

# C

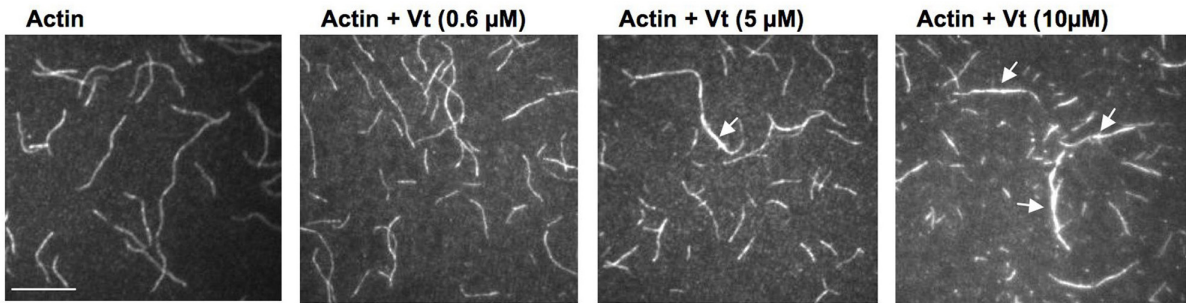

Supplement: supp_M110.102830_jbc.M110.102830-3.pdf [file supp_M110.102830_jbc.M110.102830-3.pdf]

A

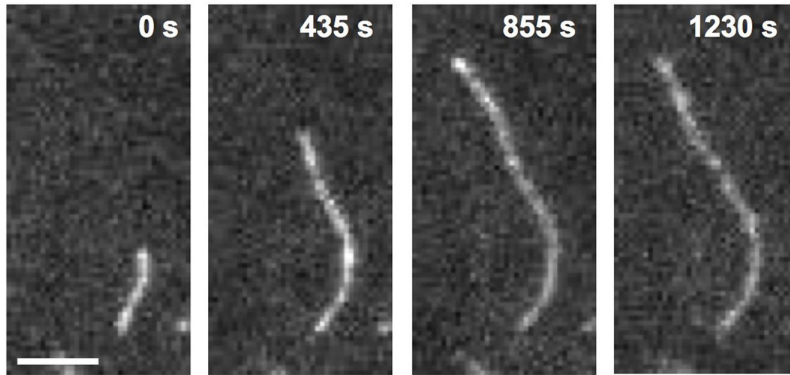

B

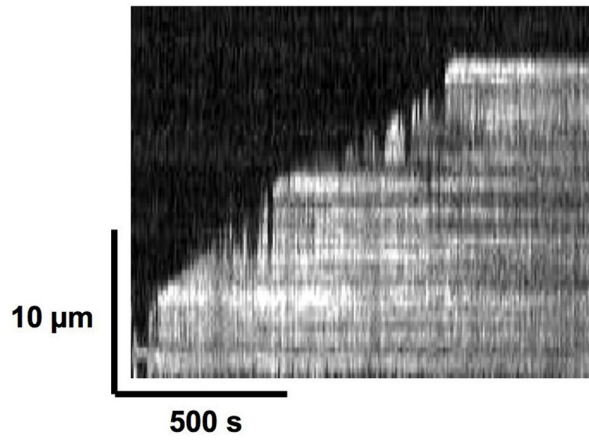

C

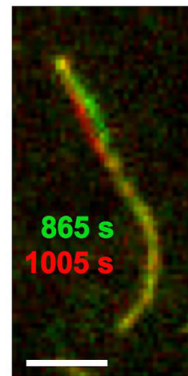

Supplement: supp_M110.102830_jbc.M110.102830-4.pdf [file supp_M110.102830_jbc.M110.102830-4.pdf]
